# Supplementary material for: Optogenetic dissection of basolateral amygdala contributions to intertemporal choice in young and aged rats
Source: eLife. 2019 Apr 24;8:e46174. doi: 10.7554/eLife.46174 (PMC6530979; doi:10.7554/eLife.46174)
Supplement: Figure 2—source data 1. [file elife-46174-fig2-data1.xlsx]

## Sheet: intrinsic property data
	Basic cell properties												Responses to 1 s light pulses					Responses to 4 s light pulses
	Input resistance (MΩ)			Whole cell capacitance (pF)			Current required to maintain membrance potential at -70mV (pA)						Outward current (pA)					Outward current (pA)			Post-pulse current (pA)
	Young	Aged		Young	Aged		Young	Aged					Young	Aged				Young	Aged		Young	Aged
	154.766	148.136		142.332	159.97		-64.0306	-25.0743					95.4368	179.862				8.26922	30.4651		0.89612	-1.35639
	169.671	215.317		94.0608	112.218		-80.4861	-17.0131					49.0123	133.802				41.0599	84.3019		1.92481	-6.76409
	98.7776	329.524		99.0609	132.566		-153.769	-61.5208					57.7779	39.0552				60.1079	15.9616		5.18979	-12.0023
	128.982	194.884		136.33	159.544		-50.2293	-114.099					104.561	128.764				25.5983	12.5964		1.87371	2.82758
	167.22	92.0009		124.858	151.535		-49.2098	-191.801					50.1034	141.806				44.7043	49.5283		6.99057	-2.51098
	201.504	92.7896		130.864	90.2309		-67.2127	-223.141					23.354	58.1323				12.6242	49.8101		-0.05688	-0.27589
	113.169	129.111		146.846	104.907		-83.02	-55.9002					103.233	97.1792				83.923	39.2692		11.177	-1.13144
	60.3176	109.726		101.915	198.42		-247.052	-120.311					74.1428	69.1316				59.4607	36.2423		-13.6751	-0.50678
	126.194	143.48		75.2563	68.2353		-135.782	-86.2771					73.5884	81.205				3.7171	86.8226		-3.15065	11.1209
	71.079	70.8253		141.051	140.129		-371.686	-142.74					95.1944	35.6091				43.5309	71.3655		0.16682	6.64293
	82.6381	80.7001		90.9929	99.4711		-59.0638	-164.123					59.2825	42.5561				109.653	37.6362		-11.1813	5.56684
	120.048	51.8976		118.065	142.592		-79.1632	-198.247					29.8152	125.375				201.667	91.4325		7.20858	15.265
	72.1123	67.5136		162.034	92.8102		-59.2414	-222.124					28.0971	167.842				58.518	39.9939		2.06461	19.4337
	70.7881	80.1181		157.561	102.193		-177.98	-139.244					35.9026	131.037				47.3791	74.3647		-0.49397	12.3342
	52.8846	49.9482		138.035	183.016		-51.4414	-86.088					58.4789	131.304				41.1259	90.1428		2.30082	3.80974
	598.642	82.7966		85.5607	176.372		-15.256	-76.5115					12.9973	88.4937				42.0926	84.3468		-2.46102	13.7086
	74.3753	110.279		117.25	131.164		-160.299	-78.1013					93.071	121.817
	81.5141	207.56		149.767	109.326		-108.023	-32.2505					93.1242	57.982
	50.902	199.997		170.542	135.292		-173.094	-86.1984					130.085	99.0577
	51.8597	118.881		139.187	164.43		-198.118	-267.974					102.964	110.874
	153.565	73.3024		202.176	99.0451		-56.5935	-267.892					274.508	89.7848
	71.9076	81.345		206.351	146.053		-71.9225	-133.287					132.921	52.1088
	113.366	104.992		230.865	115.512		4.3241	-96.9671					56.1214	77.4953
	66.4593	115.437		189.223	164.542		-57.0422	-68.5531					6.25552	56.4446
	128.014	102.189		144.519	136.625		-39.0797	-65.0276					79.0404	13.1062
	106.481	104.821		136.174	165.709		-108.269	-103.421					130.834	20.8887
		81.0134			185.878			-66.5122						106.119
		128.182			219.308			-57.7363						37.1572
