# Supplementary material for: Optogenetic dissection of basolateral amygdala contributions to intertemporal choice in young and aged rats
Source: eLife. 2019 Apr 24;8:e46174. doi: 10.7554/eLife.46174 (PMC6530979; doi:10.7554/eLife.46174)
Supplement: Figure 4—source data 1. [file elife-46174-fig4-data1.xlsx]

## Sheet: Figure 4
	A. Initial Baselines
	Block	Young								Aged
		1	2	3	4	5	6	7	8	1	2	3	4	5	6	7
	1	100	100	100	100	100	100	100	97.2222	100	100	91.6667	100	100	100	100
	2	63.8889	77.7778	88.3987	69.4444	44.4444	45.7516	65.2778	66.6667	61.1111	64.9306	25	61.7647	62.5817	56.4103	68.7908
	3	39.5425	22.2222	28.4314	27.7778	19.4444	25	34.1346	29.4118	52.7778	55	5.55556	36.8778	37.8472	27.3958	30.3309
	B. Delays by block
	Block	Young								Aged
		1	2	3	4	5	6	7	8	1	2	3	4	5	6	7
	1	0	0	0	0	0	0	0	0	0	0	0	0	0	0	0
	2	2	1.75	4	2	2	3	3	7.5	5	30	5	20	8	5	5
	3	4	2.5	5	4	3	6	6	15	10	55	10	40	28	10	10
		C. Indifference Points
		Young								Aged
		1	2	3	4	5	6	7	8	1	2	3	4	5	6	7
		3.17844	5.3523	5.01493	2.87162	1.83824	3.55336	4.50018	10.6928	9.50976	56.43	3.9247	30.2737	20.2777	6.55212	7.35047
