# Supplementary material for: Optogenetic dissection of basolateral amygdala contributions to intertemporal choice in young and aged rats
Source: eLife. 2019 Apr 24;8:e46174. doi: 10.7554/eLife.46174 (PMC6530979; doi:10.7554/eLife.46174)
Supplement: Figure 5—source data 1. [file elife-46174-fig5-data1.xlsx]

## Sheet: Figure 5
	A. Choice Behavior: Deliberation
	Block	Young: Inactivation								Young: Baseline								Aged: Inactivation							Aged: Baseline
		1	2	3	4	5	6	7	8	1	2	3	4	5	6	7	8	1	2	3	4	5	6	7	1	2	3	4	5	6	7
	1	100	100	100	100	100	100	100	100	100	100	100	100	100	100	100	97.2222	100	100	94.4444	100	100	100	100	100	100	100	94.4444	100	100	100
	2	94.7368	100	100	77.7778	83.3333	70.5882	93.75	100	63.8889	77.7778	88.3987	49.0196	36.1111	45.7516	65.2778	66.6667	100	94.7368	77.7778	77.7778	72.2222	77.7778	58.8235	61.1111	64.9306	77.7778	46.8627	72.2222	56.4103	55.0926
	3	88.8889	58.8235	81.25	47.0588	83.3333	41.1765	60	58.8235	39.5425	22.2222	28.4314	31.3725	19.4444	25	34.1346	29.4118	88.8889	94.4444	61.1111	47.0588	38.8889	50	73.3333	52.7778	55	27.7778	19.4444	19.4444	27.3958	28.6765
	C. Choice Behavior: Small Reward Outcome
	Block	Young: Baseline								Young: Inactivation								Aged: Baseline							Aged: Inactivation
		1	2	3	4	5	6	7	8	1	2	3	4	5	6	7	8	1	2	3	4	5	6	7	1	2	3	4	5	6	7
	1			100	100	100	96.0784	100	100			100	100	100	100	94.4444	94.4444	97.0588		100	94.4444	100	100	100	100		100	88.8889	100	100	100
	2			63.8889	70.1389	47.2222	50.2315	81.25	72.2222			55.5556	50	38.8889	50	50	22.2222	63.8889		52.7778	46.8627	62.5817	56.5359	68.7908	88.8889		50	33.3333	44.4444	72.2222	86.6667
	3			44.4444	32.1569	32.9861	32.6797	34.3137	33.3333			27.7778	0	0	27.7778	16.6667	27.7778	36.1111		36.1111	19.4444	37.8472	32.6389	30.3309	44.4444		22.2222	11.1111	44.4444	5.55556	62.5
	B. Trial by trial: Deliberation
		Young: Baseline								Young: Inactivation								Aged: Baseline							Aged: Inactivation
		1	2	3	4	5	6	7	8	1	2	3	4	5	6	7	8	1	2	3	4	5	6	7	1	2	3	4	5	6	7
	Small Shift	58.06	39.39	42.86	23.68	24.49	33.33	42.31	32.35	100	16.67	100	64.29	64.71	76.92	83.33	100	44.83	28.57	27.27	31.11	31.58	32.39	30.91	100	100	54.55	50	66.67	66.67	54.55
	Large Stay	71.43	78.26	84.72	83.61	77.36	72.88	79.37	78.79	95.92	94.59	93.62	76.32	69.7	66.67	86.49	86.36	79.45	89.55	85.51	73.08	81.25	70.07	83.15	95.92	96.08	85	81.58	69.44	76.92	86.11
	D. Trial by trial: Small Reward Outcome
		Young: Baseline								Young: Inactivation								Aged: Baseline							Aged: Inactivation
		1	2	3	4	5	6	7	8	1	2	3	4	5	6	7	8	1	2	3	4	5	6	7	1	2	3	4	5	6	7
	Small Stay			30.99	17.91	32.26	31.82	15.89	26.47			21.88	7.69	16.67	30	28.57	30.77	24.62		25.4	26.92	25.37	24.21	18.18	15		27.59	30.77	28.13	16.67	15.38
	Large Shift			32.2581	65.5172	55.2632	53.3333	61.9048	43.75			68.421	95.652	88.889	52.381	69.565	80	50		58.97	40	48.39	58.49	65.63	54.55		63.64	65	52.63	76.19	28.57
