# Supplementary material for: Optogenetic dissection of basolateral amygdala contributions to intertemporal choice in young and aged rats
Source: eLife. 2019 Apr 24;8:e46174. doi: 10.7554/eLife.46174 (PMC6530979; doi:10.7554/eLife.46174)
Supplement: Figure 6—source data 1. [file elife-46174-fig6-data1.xlsx]

## Sheet: Figure 6
	A. Inactivation During Delay
	Block	Young: Baseline								Young: Inactivation								Aged: Baseline							Aged: Inactivation
		1	2	3	4	5	6	7	8	1	2	3	4	5	6	7	8	1	2	3	4	5	6	7	1	2	3	4	5	6	7
	1			100	100	97.2222	100	97.2222	100			100	100	100	100	100	100	100		100	100	100	100	100	100		100	100	100	100	100
	2			55.5556	81.4815	69.4444	41.6667	71.4052	48.9583			55.5556	83.3333	70.5882	41.1765	61.1111	50	61.1111		38.8889	44.4444	88.4532	55.5556	79.902	44.4444		38.8889	94.4444	50	94.4444	55.5556
	3			36.1111	37.4728	36.1111	27.7778	36.1111	29.1667			11.1111	33.3333	38.8889	50	38.8889	17.6471	44.4444		13.8889	33.3333	36.0185	23.5294	28.0392	38.8889		5.55556	70.5882	33.3333	27.7778	16.6667
	B. Inactivation During Large Reward Outcome
	Block	Young: Baseline								Young: Inactivation								Aged: Baseline							Aged: Inactivation
		1	2	3	4	5	6	7	8	1	2	3	4	5	6	7	8	1	2	3	4	5	6	7	1	2	3	4	5	6	7
	1			100	100	91.6667	100	94.1176	100			100	100	100	100	100	100	100		100	100	100	100	100	100		94.4444	100	100	100	100
	2			80.5556	69.4444	38.8889	62.6362	68.6274	55.5556			83.3333	77.7778	33.3333	44.4444	50	50	30.5556		52.7778	61.7647	64.8148	55.5556	67.6471	11.1111		47.0588	100	61.1111	72.2222	61.1111
	3			71.5686	27.7778	16.6667	39.3464	38.5417	35			55.5556	11.1111	16.6667	27.7778	33.3333	44.4444	11.1111		36.1111	36.8778	33.6601	25.6536	15.0735	5.55556		5.55556	44.4444	5.55556	50	58.8235
	C. Inactivation During Delay+Large Reward Outcome
	Block	Young: Baseline								Young: Inactivation								Aged: Baseline							Aged: Inactivation
		1	2	3	4	5	6	7	8	1	2	3	4	5	6	7	8	1	2	3	4	5	6	7	1	2	3	4	5	6	7
	1						100	97.2222	97.2222						100	94.4444	100					100	100	100					100	100	100
	2						61.1111	58.3333	66.6667						61.1111	61.1111	72.2222					62.5817	56.4103	68.7908					61.1111	66.6667	76.4706
	3						44.5701	19.4444	29.4118						37.5	33.3333	22.2222					37.8472	27.3958	30.3309					38.8889	29.4118	22.2222
