# Supplementary material for: Optogenetic dissection of basolateral amygdala contributions to intertemporal choice in young and aged rats
Source: eLife. 2019 Apr 24;8:e46174. doi: 10.7554/eLife.46174 (PMC6530979; doi:10.7554/eLife.46174)
Supplement: Figure 7—source data 1. [file elife-46174-fig7-data1.xlsx]

## Sheet: Figure 7
	Inactivation During ITI
	Block	Young: Baseline								Young: Inactivation								Aged: Baseline							Aged: Inactivation
		1	2	3	4	5	6	7	8	1	2	3	4	5	6	7	8	1	2	3	4	5	6	7	1	2	3	4	5	6	7
	1			100	100	100	100	96.2963	100			100	100	100	100	100	100	100		91.6667	100	100	100	88.8889	100		88.8889	100	100	100	100
	2			47.2222	66.6667	44.4444	55.5556	82.8976	70.5882			50	52.9412	50	38.8889	83.3333	88.8889	77.7778		25	17.1569	72.2222	77.7778	52.9412	66.6667		27.7778	27.7778	88.8889	94.4444	53.3333
	3			8.33333	29.4118	19.4444	26.7361	36.7647	44.1176			35.2941	20	11.1111	26.6667	20	38.8889	52.7778		5.55556	5.55556	33.3333	38.8889	35.7143	11.1111		11.1111	0	50	66.6667	28.5714
