# Supplementary material for: Optogenetic dissection of basolateral amygdala contributions to intertemporal choice in young and aged rats
Source: eLife. 2019 Apr 24;8:e46174. doi: 10.7554/eLife.46174 (PMC6530979; doi:10.7554/eLife.46174)
Supplement: Figure 8—source data 1. [file elife-46174-fig8-data1.xlsx]

## Sheet: Figure 8
	A. Laser Delivery During Deliberation
	Block	Young: Baseline				Young: Inactivation				Aged: Baseline				Aged Inactivation
		1	2	3	4	1	2	3	4	1	2	3	4	1	2	3	4
	1	100	98.1482	100	96.2963	100	94.4444	100	100	98.1482	100	100	100	100	100	100	100
	2	56.8627	56.7538	59.0278	74.7277	44.4444	58.8235	75	72.2222	71.7429	38.8889	77.2876	59.3682	66.6667	41.1765	66.6667	52.9412
	3	31.1905	33.3333	36.6667	46.2652	27.7778	35.2941	26.6667	50	29.2609	16.6667	54.7059	33.3333	5.88235	38.8889	52.9412	41.6667
	B. Laser Delivery During Small Reward Outcome
	Block	Baseline				Inactivation
		1	2	3	4	1	2	3	4
	1	92.3747	100	100	100	94.4444	100	100	100
	2	49.0196	50	50	91.5033	43.75	61.1111	75	83.3333
	3	22.658	30.3309	26.0971	57.0261	25	11.7647	53.3333	56.25
