# Supplementary material for: Optogenetic dissection of basolateral amygdala contributions to intertemporal choice in young and aged rats
Source: eLife. 2019 Apr 24;8:e46174. doi: 10.7554/eLife.46174 (PMC6530979; doi:10.7554/eLife.46174)
Supplement: Table 1—source data 1. [file elife-46174-table1-data1.xlsx]

## Sheet: Sheet1
		Effect of BLA inactivation of Trials Completed: Deliberation
		Baseline								Inactivation
	Young	53.5	54	53	53	54	53.5	47.5	53	55	46	53	53	54	52	47	53
	Aged	54	47.5	54	51.5	54	50	51		54	55	54	53	54	54	50
		Effect of BLA inactivation of Trials Completed: Small Reward Outcome
		Baseline								Inactivation
	Young	54	51	53	52.3333	52.666	53			54	52	54	54	54	54
	Aged	53.5	54	51.5	52.5	52.3333	52			54	54	54	54	54	49
