# Supplementary material for: Optogenetic dissection of basolateral amygdala contributions to intertemporal choice in young and aged rats
Source: eLife. 2019 Apr 24;8:e46174. doi: 10.7554/eLife.46174 (PMC6530979; doi:10.7554/eLife.46174)
Supplement: Table 2—source data 1. [file elife-46174-table2-data1.xlsx]

## Sheet: Sheet1
	Free Choice Latency: Deliberation Large Lever
		Baseline								Inactivation
	Young	1.0895	1.408	1.0035	1.092	1.211	2.6305	1.6895	0.9535	1.09	1.94	1.036	1.289	1.046	2.42	1.833	0.882
	Aged	0.7185	0.9445		0.825	1.7295	0.436	0.92775	1.11333	0.838	0.903		0.902	2.273	0.456	0.854	1.527
	Free Choice Latency: Deliberation Small Lever
		Baseline								Inactivation
	Young	0.8385	1.182	0.837	1.3035	1.256				0.793	1.244	0.86	1.709	3.108
	Aged	0.827	0.7225	0.5725	1.14625	1.94433				1.072	1.111	0.693	0.934	1.789
	Free Choice Latency: Small Reward Outcome Large Lever
		Baseline								Inactivation
	Young	1.2265	1.2795	1.174	2.06033	1.326	0.863			0.974	0.978	0.965	1.723	1.68	0.98
	Aged	0.753	1.176	0.881	0.515	0.998	1.1495			0.727	1.355	0.724	0.464	0.871	1.077
	Free Choice Latency: Small Reward Outcome Small Lever
		Baseline								Inactivation
	Young	1.013	1.5045	1.0625	1.125	1.2245	0.712			0.937	1.045	0.909	0.977	1.047	0.71
	Aged	0.784	0.901	0.7225	0.667	0.84	1.858			0.766	1.005	0.654	0.659	0.885	0.852
